# Supplementary material for: Hydrogen bonding bolstered head-to-tail ligation of functional chromophores in a 0D SbF3·glycine adduct for a short-wave ultraviolet nonlinear optical material
Source: Royal Society of Chemistry journal article supplement (doi:10.1039/d4sc01353k), 2024-01-01
Supplement: d4sc01353k1.pdf [file d4sc01353k1.pdf]

Electronic Supplementary Information (ESI) for

**Hydrogen bonding bolstered head-to-tail ligation of functional  
chromophores in 0D SbF<sub>3</sub>·Glycine adduct for short-wave ultraviolet  
nonlinear optical material**

Zhiyong Bai, Jihyun Lee, Chun-Li Hu,\* Guohong Zou,\* and Kang Min Ok\*

Department of Chemistry, Sogang University, Seoul, 04107, Republic of Korea

E-mail: kmok@sogang.ac.kr

## Experimental Procedures

**Synthesis.** Glycine (Alfa Aesar, 98+%) and SbF<sub>3</sub> (Alfa Aesar, 98%) were used as starting reagents. Typically, stoichiometric glycine (10 mmol, 0.75 g) and SbF<sub>3</sub> (10 mmol, 1.79g) were dissolved in 10 mL deionized water under constant stirring at 40 °C until a clear solution was prepared. The solution was filtered and then evaporated at room temperature. After about three days, small block crystals were harvested. Powder X-ray diffraction (XRD) pattern of the ground bulk crystals is in good agreement with the simulation pattern (Figure S1).

**Powder X-ray diffraction.** The test was executed at room temperature on a Rigaku MiniFlex 600 diffractometer equipped with Cu K $\alpha$  radiation ( $\lambda = 1.5406 \text{ \AA}$ ). The  $2\theta$  range was 10–60° with a scan step width of 0.02° and a fixed counting time of 5 s per step.

**Single-crystal structure determination.** The single crystal X-ray diffraction data were collected on a Bruker APEX-II CCD diffractometer utilizing Mo K $\alpha$  radiation ( $\lambda = 0.71073 \text{ \AA}$ ) at 273.15 K. Data reduction, cell refinement, and absorption corrections were conducted with the program APEX 4. The structure was solved by intrinsic phasing method and refined on  $F^2$  by full-matrix least-squares techniques using the program Olex2<sup>[1]</sup>. The structure was checked by program PLATON<sup>[2]</sup> and no higher symmetry was found. Crystal data and structure refinement are given in Table S1. Atomic coordinates with equivalent isotropic displacement parameters, bond lengths, bond angles, torsion angles, and hydrogen bonds are presented in Table S2-S6.

**UV-Vis reflectance spectrum.** Ultraviolet–visible (UV–vis) transmittance spectra were collected on a JASCO V-660 spectrometer in the wavelength range of 200–800 nm. In order to determine the band gap, the diffuse reflectance spectral data were subsequently transferred to the function of reflectance by using Kubelka function:

$$F(R) = \frac{(1 - R)^2}{2R} = \frac{K}{S}$$

where  $R$  denotes the reflectance,  $K$  the absorption coefficient and  $S$  the scattering factor. In the  $F(R)$  versus  $E$  (eV) plot, extrapolating the linear part of the rising curve to zero provides the onset of the absorption.

**SHG Response.** According to method proposed by Kurtz and Perry<sup>[3]</sup>, powder SHG measurements were carried out by using 1064 nm coherent light, generated by Q-switched Nd: YAG laser, as incident source. Specifically, polycrystalline samples of title compound and  $\text{KH}_2\text{PO}_4$  (KDP) were ground and sieved into distinct particle size ranges (<20, 20-45, 45-63, 63-75, 75-90, 90-125, 125-150, 150-200, and 200-250  $\mu\text{m}$ ). Sieved KDP powder was used as a reference. The intensity of the frequency-doubled output emitted from the sample was collected using a photomultiplier tube.

**TGA test.** Thermogravimetric analysis (TGA) was performed by using a SCINCO TGA-n 1000 thermal analyzer. Powder samples in weight of about 6 mg were loaded to alumina crucibles and heated from 25 to 600  $^\circ\text{C}$  at a rate of 10  $^\circ\text{C min}^{-1}$  under flowing air.

**Computation Method.** The electronic structures and optical properties were performed using a plane-wave basis set and pseudo-potentials within density functional theory (DFT) implemented in the total-energy code CASTEP.<sup>[4]</sup> For the exchange and correlation function, Perdew-Burke-Ernzerhof in the generalized gradient approximation was chosen.<sup>[5]</sup> The interactions between the ionic cores and the electrons were described by the norm-conserving pseudopotential.<sup>[6]</sup> The following valence-electron configurations were considered in the computation: Sb-5s<sup>2</sup>5p<sup>3</sup>, F-2s<sup>2</sup>2p<sup>5</sup>, C-2s<sup>2</sup>2p<sup>2</sup>, N-2s<sup>2</sup>2p<sup>3</sup>, O-2s<sup>2</sup>2p<sup>4</sup>, and H-1s<sup>1</sup>. The number of plane waves included in the basis sets was determined by a cutoff energy of 850 eV. The numerical integration of the Brillouin zone was performed using a Monkhorst-Pack k-point sampling of  $5 \times 5 \times 5$ . The other parameters and convergent criteria were the default values of the CASTEP code.

The calculation of second-order NLO properties were based on length-gauge formalism within the independent-particle approximation.<sup>[7]</sup> We adopted the Chen's static formula, which has been derived by Rashkeev et al. and later modified by Chen's group.<sup>[6, 8]</sup> The static second-order NLO susceptibility can be expressed as

$$\chi^{\alpha\beta\gamma} = \chi^{\alpha\beta\gamma}(\text{VE}) + \chi^{\alpha\beta\gamma}(\text{VH}) + \chi^{\alpha\beta\gamma}(\text{two bands})$$

where  $\chi^{\alpha\beta\gamma}(\text{VE})$  and  $\chi^{\alpha\beta\gamma}(\text{VH})$  give the contributions to  $\chi^{\alpha\beta\gamma}$  from virtual-electron processes and virtual-hole processes, respectively;  $\chi^{\alpha\beta\gamma}(\text{two bands})$  is the contribution to  $\chi^{\alpha\beta\gamma}$  from the two-band processes.

## References

- [1] O. V. Dolomanov, L. J. Bourhis, R. J. Gildea, J. A. K. Howard, H. Puschmann, *J. Appl. Crystallogr.* **2009**, *42*, 339-341.
- [2] S. A. L., *J. Appl. Crystallogr.* **2003**, *36*, 7-13.
- [3] S. K. Kurtz, T. T. Perry, *J. Appl. Phys.* **1968**, *39*, 3798-3813.
- [4] a) V. W. Milman, B.; White, J. A.; Pickard, C. J.; Payne, M. C.; Akhmatkaya, E. V.; Nobes, R. H., *Int. J. Quantum Chem.* **2000**, *77*, 895–910; b) M. D. L. Segall, P. J.; Probert, M. A.; Pickard, C. J.; Hasnip, P. J.; Clark, S. J.; & Payne, M. C., *J. Phys.: Condens. Matter* **2002**, *14*, 2717–2744.
- [5] J. P. B. Perdew, K.; Ernzerhof, M. P, *Phys. Rev. Lett.* **1996**, *77*, 3865–3868.
- [6] J. L. Lin, M. H.; Liu, Z. P.; Chen, C.; Pickard, C. J., *Phys. Rev. B* **1999**, *60*, 13380–13389.
- [7] C. Aversa, J. E. Sipe, *Phys. Rev. B Condens. Matter* **1995**, *52*, 14636-14645.
- [8] S. N. L. Rashkeev, W. R.; Segall, B., *Phys. Rev. B* **1998**, *57*, 3905-3919.

**Table S1.** Crystal data and structure refinement for SbF<sub>3</sub>·Gly.

|                                                        |                                                                                |
|--------------------------------------------------------|--------------------------------------------------------------------------------|
| Empirical formula                                      | C <sub>2</sub> H <sub>5</sub> F <sub>3</sub> NO <sub>2</sub> Sb                |
| Formula weight                                         | 253.82                                                                         |
| Temperature [K]                                        | 273.15                                                                         |
| Crystal system                                         | monoclinic                                                                     |
| Space group (number)                                   | <i>Pc</i> (7)                                                                  |
| <i>a</i> [Å]                                           | 6.9889(4)                                                                      |
| <i>b</i> [Å]                                           | 6.7515(4)                                                                      |
| <i>c</i> [Å]                                           | 6.4707(4)                                                                      |
| $\beta$ [°]                                            | 90.289(2)                                                                      |
| Volume [Å <sup>3</sup> ]                               | 305.32(3)                                                                      |
| <i>Z</i>                                               | 2                                                                              |
| $\rho_{\text{calc}}$ [gcm <sup>-3</sup> ]              | 2.761                                                                          |
| $\mu$ [mm <sup>-1</sup> ]                              | 4.510                                                                          |
| <i>F</i> (000)                                         | 236                                                                            |
| Radiation                                              | Mo <i>K</i> <sub>α</sub> ( $\lambda=0.71073$ Å)                                |
| 2 $\theta$ range [°]                                   | 6.03 to 55.01 (0.77 Å)                                                         |
| Index ranges                                           | -9 ≤ <i>h</i> ≤ 9<br>-8 ≤ <i>k</i> ≤ 8<br>-8 ≤ <i>l</i> ≤ 8                    |
| Reflections collected                                  | 6264                                                                           |
| Independent reflections                                | 1366<br><i>R</i> <sub>int</sub> = 0.0508<br><i>R</i> <sub>sigma</sub> = 0.0381 |
| Data / Restraints / Parameters                         | 1366/2/84                                                                      |
| Goodness-of-fit on <i>F</i> <sup>2</sup>               | 1.087                                                                          |
| Final <i>R</i> indexes<br>[ <i>I</i> ≥ 2σ( <i>I</i> )] | <i>R</i> <sub>1</sub> = 0.0202<br><i>wR</i> <sub>2</sub> = 0.0476              |
| Final <i>R</i> indexes<br>[all data]                   | <i>R</i> <sub>1</sub> = 0.0206<br><i>wR</i> <sub>2</sub> = 0.0479              |
| Largest peak/hole [eÅ <sup>-3</sup> ]                  | 0.73/-0.71                                                                     |
| Flack <i>x</i> parameter                               | 0.20(4)                                                                        |

**Table S2.** Atomic coordinates and  $U_{\text{eq}}$  [ $\text{\AA}^2$ ] for  $\text{SbF}_3 \cdot \text{Gly}$ .  $U_{\text{eq}}$  is defined as 1/3 of the trace of the orthogonalized  $U_{ij}$  tensor.

| Atom | $x$        | $y$        | $z$        | $U_{\text{eq}}$ |
|------|------------|------------|------------|-----------------|
| Sb1  | 0.67092(6) | 0.28163(4) | 0.67117(6) | 0.01907(13)     |
| F1   | 0.9467(6)  | 0.2318(5)  | 0.7599(7)  | 0.0298(9)       |
| F2   | 0.7867(5)  | 0.5156(6)  | 0.5609(5)  | 0.0374(8)       |
| F3   | 0.7527(5)  | 0.1105(6)  | 0.4464(5)  | 0.0336(8)       |
| O1   | 0.3138(6)  | 0.0960(8)  | 0.4687(7)  | 0.0356(10)      |
| O2   | 0.4679(6)  | 0.3807(6)  | 0.4223(7)  | 0.0312(9)       |
| C1   | 0.2039(9)  | 0.3184(10) | 0.2074(12) | 0.0295(16)      |
| C2   | 0.3347(10) | 0.2539(9)  | 0.3825(11) | 0.0232(12)      |
| N1   | 0.0552(6)  | 0.1666(8)  | 0.1633(7)  | 0.0228(9)       |
| H1A  | 0.142391   | 0.442301   | 0.243949   | 0.035           |
| H1B  | 0.279208   | 0.340860   | 0.084107   | 0.035           |
| H1C  | -0.012458  | 0.202723   | 0.052735   | 0.027           |
| H1D  | -0.022075  | 0.155520   | 0.271577   | 0.027           |
| H1E  | 0.111268   | 0.050515   | 0.139251   | 0.027           |

**Table S3.** Anisotropic displacement parameters [ $\text{\AA}^2$ ] for  $\text{SbF}_3 \cdot \text{Gly}$ . The anisotropic displacement factor exponent takes the form:  
 $-2\pi^2 [ h^2(a^*)^2U_{11} + k^2(b^*)^2U_{22} + \dots + 2hka^*b^*U_{12} ]$

| Atom | $U_{11}$    | $U_{22}$    | $U_{33}$    | $U_{23}$    | $U_{13}$     | $U_{12}$    |
|------|-------------|-------------|-------------|-------------|--------------|-------------|
| Sb1  | 0.01816(17) | 0.01898(18) | 0.02004(17) | 0.0001(3)   | -0.00260(11) | 0.0001(3)   |
| O1   | 0.0303(19)  | 0.040(3)    | 0.036(2)    | 0.014(2)    | -0.0131(16)  | -0.008(2)   |
| F2   | 0.0366(18)  | 0.0296(19)  | 0.046(2)    | 0.0153(17)  | -0.0176(15)  | -0.0150(15) |
| F3   | 0.0298(16)  | 0.039(2)    | 0.0318(16)  | -0.0114(16) | 0.0013(13)   | 0.0052(15)  |
| O2   | 0.0248(18)  | 0.030(2)    | 0.038(2)    | 0.0021(19)  | -0.0157(15)  | -0.0039(18) |
| C2   | 0.018(3)    | 0.030(3)    | 0.022(3)    | -0.002(2)   | -0.005(3)    | 0.001(2)    |
| F1   | 0.019(2)    | 0.036(2)    | 0.034(2)    | 0.0021(15)  | -0.0078(17)  | 0.0033(13)  |
| C1   | 0.018(4)    | 0.028(3)    | 0.042(5)    | 0.008(3)    | -0.012(3)    | -0.007(2)   |
| N1   | 0.019(2)    | 0.025(2)    | 0.024(2)    | 0.000(2)    | -0.0063(18)  | -0.004(2)   |

**Table S4.** Bond lengths and angles for SbF<sub>3</sub>·Gly.

| <b>Atom–Atom</b> | <b>Length [Å]</b> | <b>Atom–Atom–<br/>Atom</b> | <b>Angle [°]</b> | <b>Atom–Atom–<br/>Atom</b> | <b>Angle [°]</b> |
|------------------|-------------------|----------------------------|------------------|----------------------------|------------------|
| Sb1–F2           | 1.914(3)          | F2–Sb1–F3                  | 94.86(16)        | N1–C1–C2                   | 111.3(5)         |
| Sb1–F3           | 1.946(3)          | F2–Sb1–O2                  | 75.72(15)        | N1–C1–H1A                  | 109.4            |
| Sb1–O2           | 2.243(4)          | F2–Sb1–F1                  | 80.79(15)        | N1–C1–H1B                  | 109.4            |
| Sb1–F1           | 2.036(4)          | F3–Sb1–O2                  | 80.06(16)        | C1–N1–H1C                  | 109.5            |
| O1–C2            | 1.213(9)          | F3–Sb1–F1                  | 80.30(16)        | C1–N1–H1D                  | 109.5            |
| O2–C2            | 1.290(8)          | F1–Sb1–O2                  | 147.79(18)       | C1–N1–H1E                  | 109.5            |
| C2–C1            | 1.516(9)          | C2–O2–Sb1                  | 113.5(4)         | H1C–N1–H1D                 | 109.5            |
| C1–H1A           | 0.9700            | O1–C2–O2                   | 125.5(6)         | H1C–N1–H1E                 | 109.5            |
| C1–H1B           | 0.9700            | O1–C2–C1                   | 121.5(6)         | H1D–N1–H1E                 | 109.5            |
| C1–N1            | 1.486(7)          | O2–C2–C1                   | 113.0(6)         |                            |                  |
| N1–H1C           | 0.8900            | C2–C1–H1A                  | 109.4            |                            |                  |
| N1–H1D           | 0.8900            | C2–C1–H1B                  | 109.4            |                            |                  |
| N1–H1E           | 0.8900            | H1A–C1–H1B                 | 108.0            |                            |                  |



**Table S5.** Torsion angles for SbF<sub>3</sub>·Gly.

| <b>Atom–Atom–Atom–Atom</b> | <b>Torsion Angle [°]</b> |
|----------------------------|--------------------------|
| Sb1–O2–C2–O1               | 0.9(10)                  |
| Sb1–O2–C2–C1               | –177.4(5)                |
| O1–C2–C1–N1                | 0.4(10)                  |
| O2–C2–C1–N1                | 178.7(6)                 |

**Table S6.** Hydrogen bonds of SbF<sub>3</sub>·Gly.

| <b>D–H···A [Å]</b> | <b>[ARU]</b> | <b>d(D–H) [Å]</b> | <b>d(H···A) [Å]</b> | <b>d(D···A) [Å]</b> | <b>&lt;(DHA) [°]</b> |
|--------------------|--------------|-------------------|---------------------|---------------------|----------------------|
| N1–H1C···F1        | [1454.01]    | 0.89              | 1.92                | 2.750(7)            | 154                  |
| N1–H1D···F3        | [1455.01]    | 0.89              | 1.97                | 2.830(6)            | 163                  |
| N1–H1C···F2        | [2464.01]    | 0.89              | 2.36                | 2.924(6)            | 121                  |
| N1–H1E···F1        | [ 2454.01]   | 0.89              | 2.36                | 2.865(6)            | 116                  |
| N1–H1E···O1        | [ 2554.01]   | 0.89              | 2.05                | 2.832(7)            | 145                  |

Translation of ARU-Code to CIF and Equivalent Position Code: [2564.] = [2\_564] = x, 1-y, -1/2+z; [2554.] = [2\_554] = x, -y, -1/2+z; [1454.] = [1\_454] = -1+x, y, -1+z; [1455.] = [1\_455] = -1+x, y, z; [2454.] = [2\_454] = -1+x, -y, -1/2+z.

**Table S7.** Bond valence sum (BVS) calculations for SbF<sub>3</sub>·Gly.

| <b>Bond</b> | <b>Distance/Å</b> | <b>BVS</b>   |
|-------------|-------------------|--------------|
| Sb1-F2      | 1.9140            | 0.920        |
| Sb1-F3      | 1.9460            | 1.763        |
| Sb1-F1      | 2.0360            | 2.424        |
| Sb1-O2      | 2.2430            | <b>2.906</b> |

**Table S8.** The calculated dipole moments of [SbOF<sub>3</sub>] polyhedra in SbF<sub>3</sub>·Gly (Units: Debye).

| <b>Species</b>                      | <b>x-component</b> | <b>y-component</b> | <b>z-component</b> | <b>Magnitude</b> |
|-------------------------------------|--------------------|--------------------|--------------------|------------------|
| [Sb1OF <sub>3</sub> ]               | 5.23               | -1.65              | -6.82              | 8.76             |
| [Sb1OF <sub>3</sub> ] <sup>#1</sup> | 5.23               | 1.65               | -6.82              | 8.76             |
| Sum                                 | 10.46              | 0                  | -13.64             |                  |

**Table S9.** The calculated SHG coefficient  $d_{ij}$  for  $\text{SbF}_3 \cdot \text{Gly}$ .

| $d_{ij}$ (pm/V)                                   | Magnitude                 |
|---------------------------------------------------|---------------------------|
| $d_{11}$                                          | -0.380                    |
| $d_{12} = d_{26}$                                 | -0.495                    |
| $d_{13} = d_{35}$                                 | -1.438                    |
| $d_{15} = d_{31}$                                 | -0.926                    |
| $d_{24} = d_{32}$                                 | <b>1.475</b>              |
| $d_{33}$                                          | -1.176                    |
| $d_{\text{eff}}$                                  | 1.538                     |
| Powder SHG efficiency<br>(200-250 $\mu\text{m}$ ) | $3.6 \times \text{KDP}^a$ |

<sup>a</sup> The  $d_{36}$  of standard KDP is 0.39 pm/V. The largest tensor  $d_{32}$  and  $d_{\text{eff}}$  of  $\text{SbF}_3 \cdot \text{Gly}$  is *ca.* 3.8 and 3.9 times that of  $d_{36}$  of KDP, respectively, consistent with the experimental results.

For point group  $m$ , there are 10 nonvanishing SHG tensor:

$$\begin{pmatrix} d_{11} & d_{12} & d_{13} & 0 & d_{15} & 0 \\ 0 & 0 & 0 & d_{24} & 0 & d_{26} \\ d_{31} & d_{32} & d_{33} & 0 & d_{35} & 0 \end{pmatrix}$$

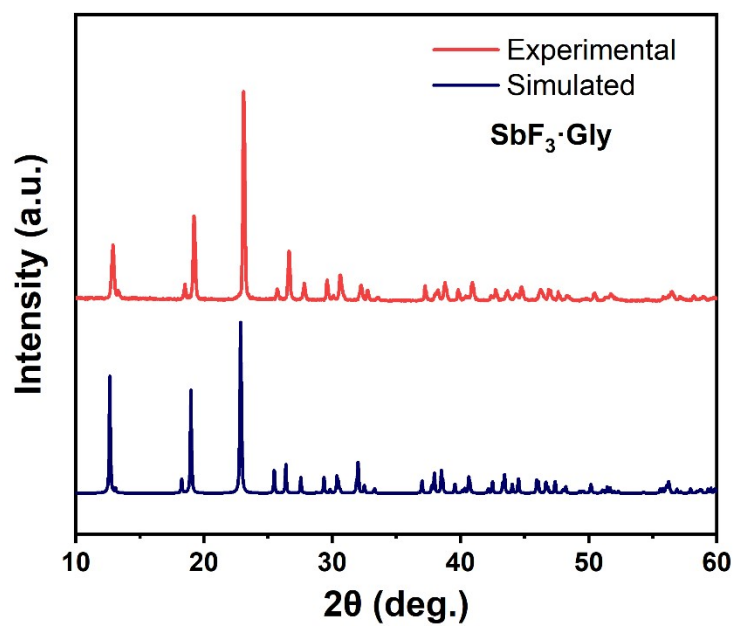

**Fig. S1** The powder X-ray diffraction (PXRD) patterns for  $\text{SbF}_3 \cdot \text{Gly}$ .

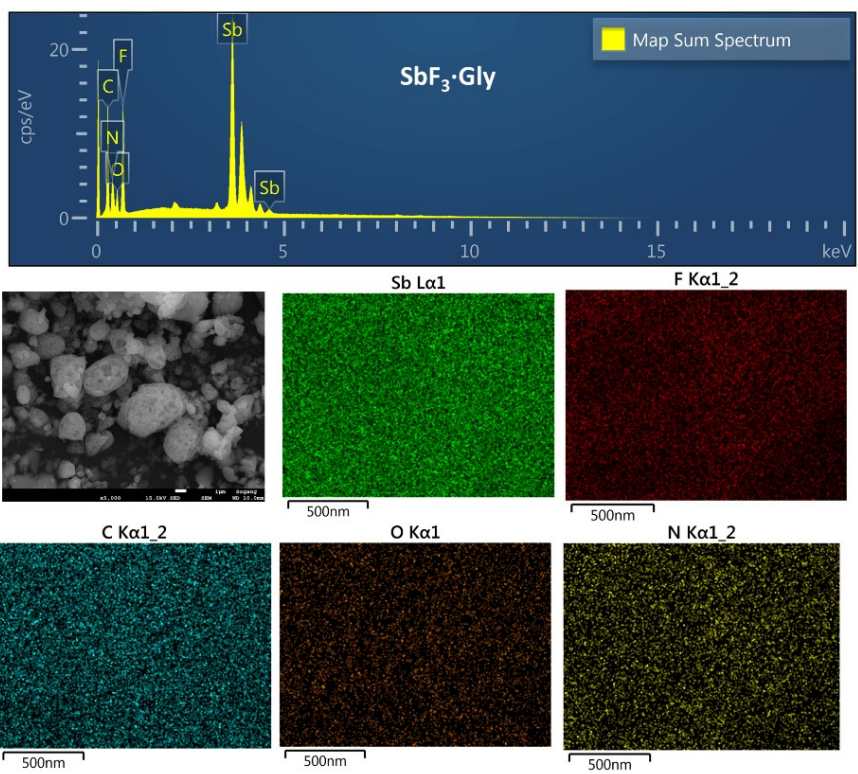

**Fig. S2** The EDS mapping for  $\text{SbF}_3 \cdot \text{Gly}$ .

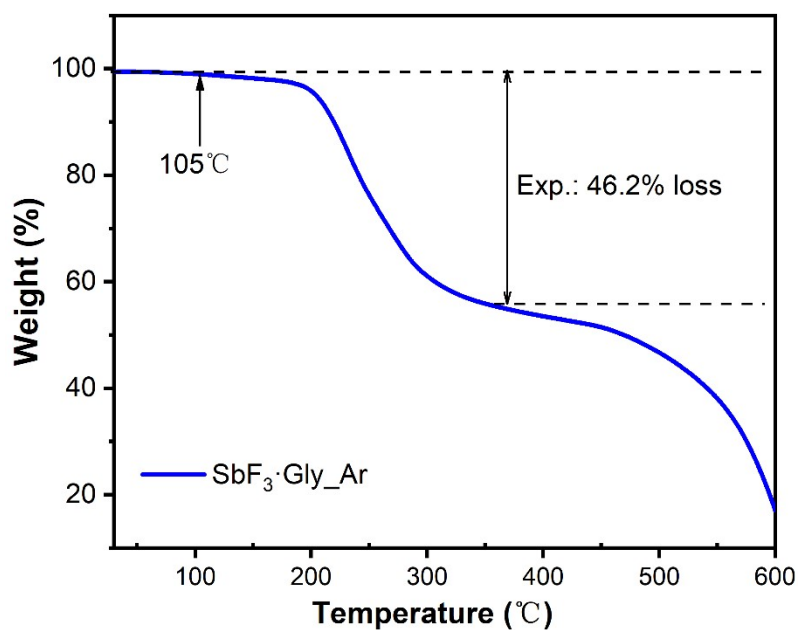

**Fig. S3** The thermogravimetric (TG) plot of  $\text{SbF}_3 \cdot \text{Gly}$  recorded from 30 to 600 °C. It can be stable up to *ca.* 105 °C and above this temperature it starts a slow decomposition. The obvious weight loss started from about 200 °C and the decomposition process is complicated.



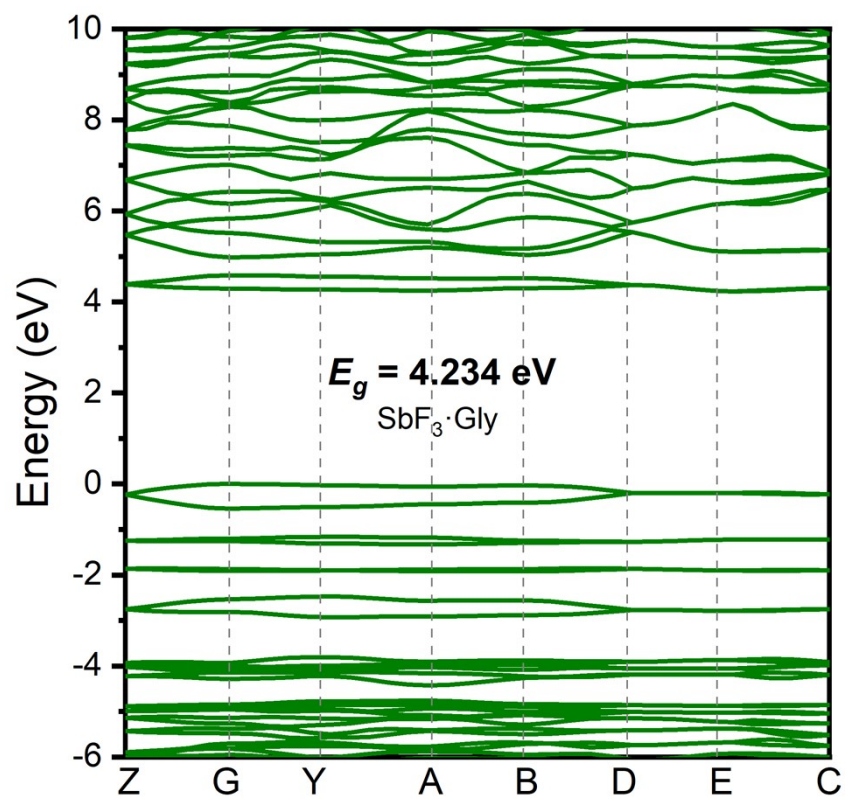

**Fig. S4** The calculated band structure for SbF<sub>3</sub>·Gly.

SbF<sub>3</sub>·Gly

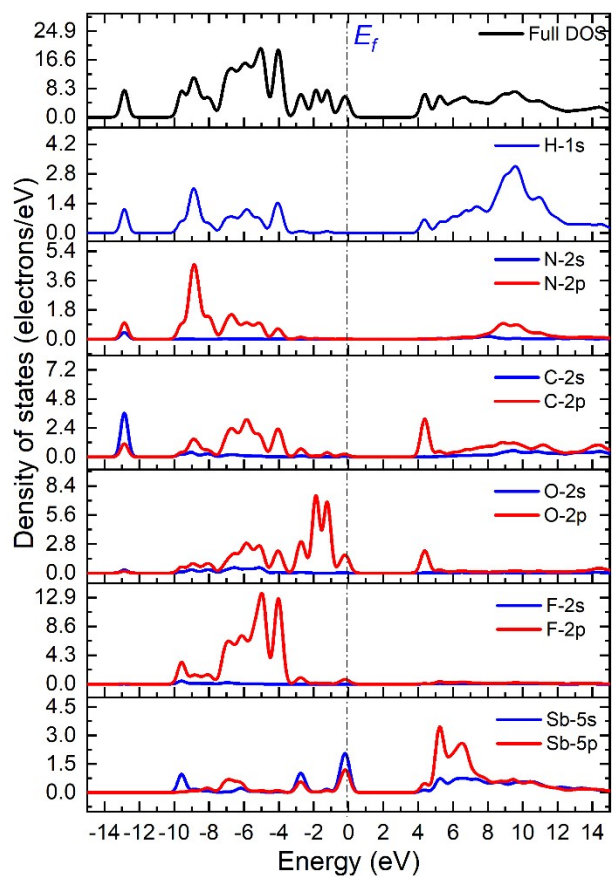

**Fig. S5** The calculated partial densities of states (PDOS) for SbF<sub>3</sub>·Gly.

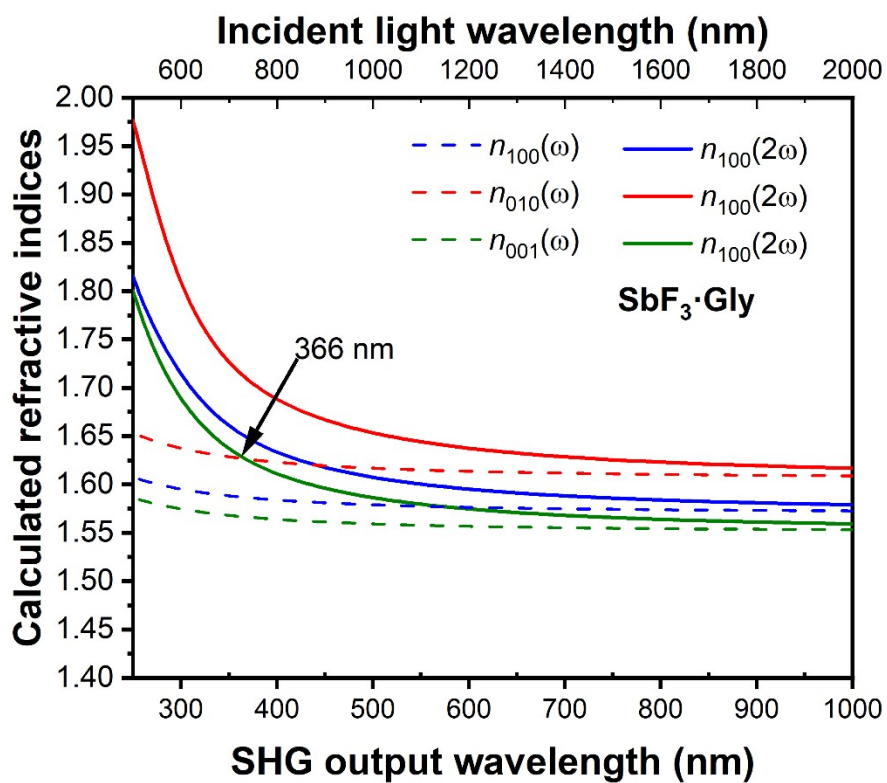

**Fig. S6** The evaluated phase-matching (PM) ability of SbF<sub>3</sub>·Gly based on the calculated refractive indices.
